# Supplementary material for: Evaluation of Changes in Polymer Material Properties Due to Aging in Different Environments
Source: MDPI journal article supplement (doi:10.3390/polym14091682), 2022-04-21
Supplement: s1 [file s1]

*Supplementary Material*

**Content:**

**IR spectra**

**2-16**

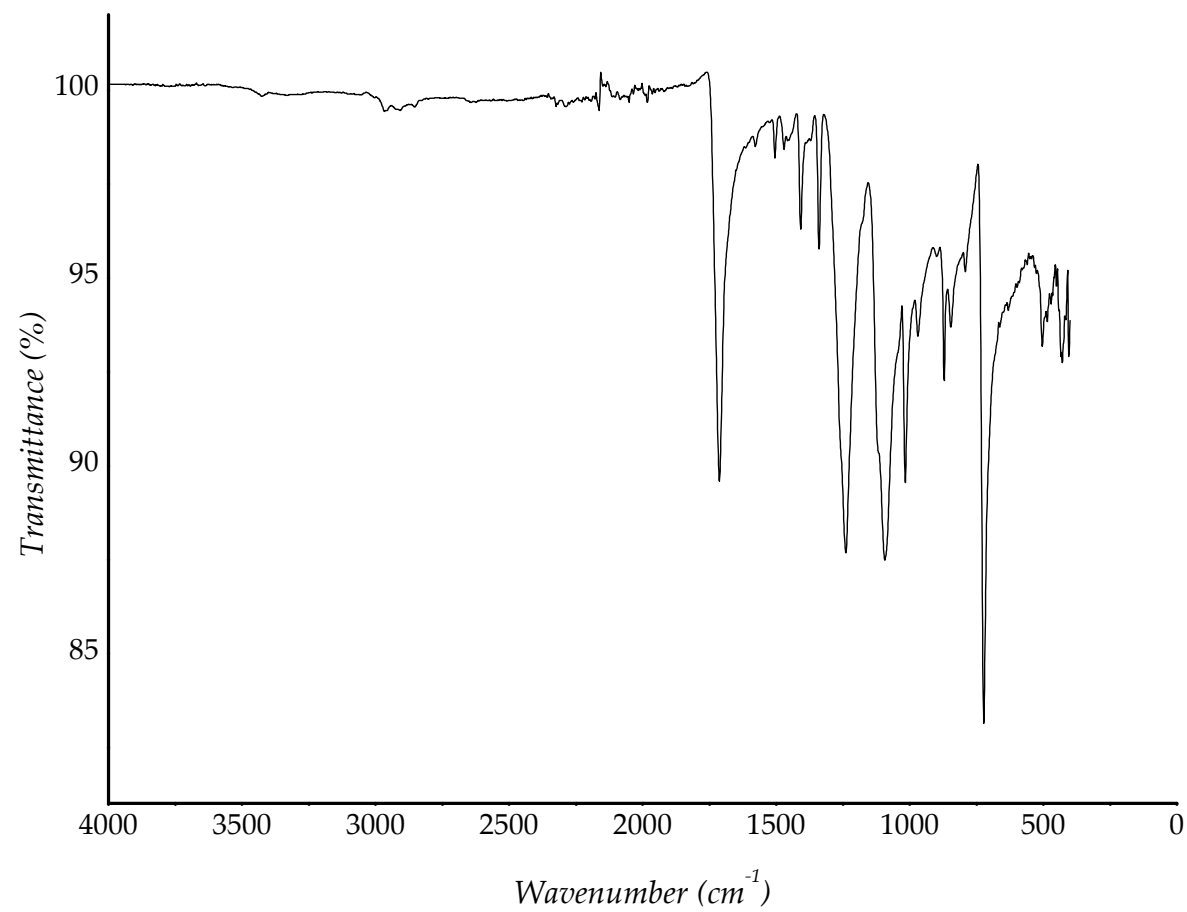

**Figure S1.** IR spectrum of compound **F10**

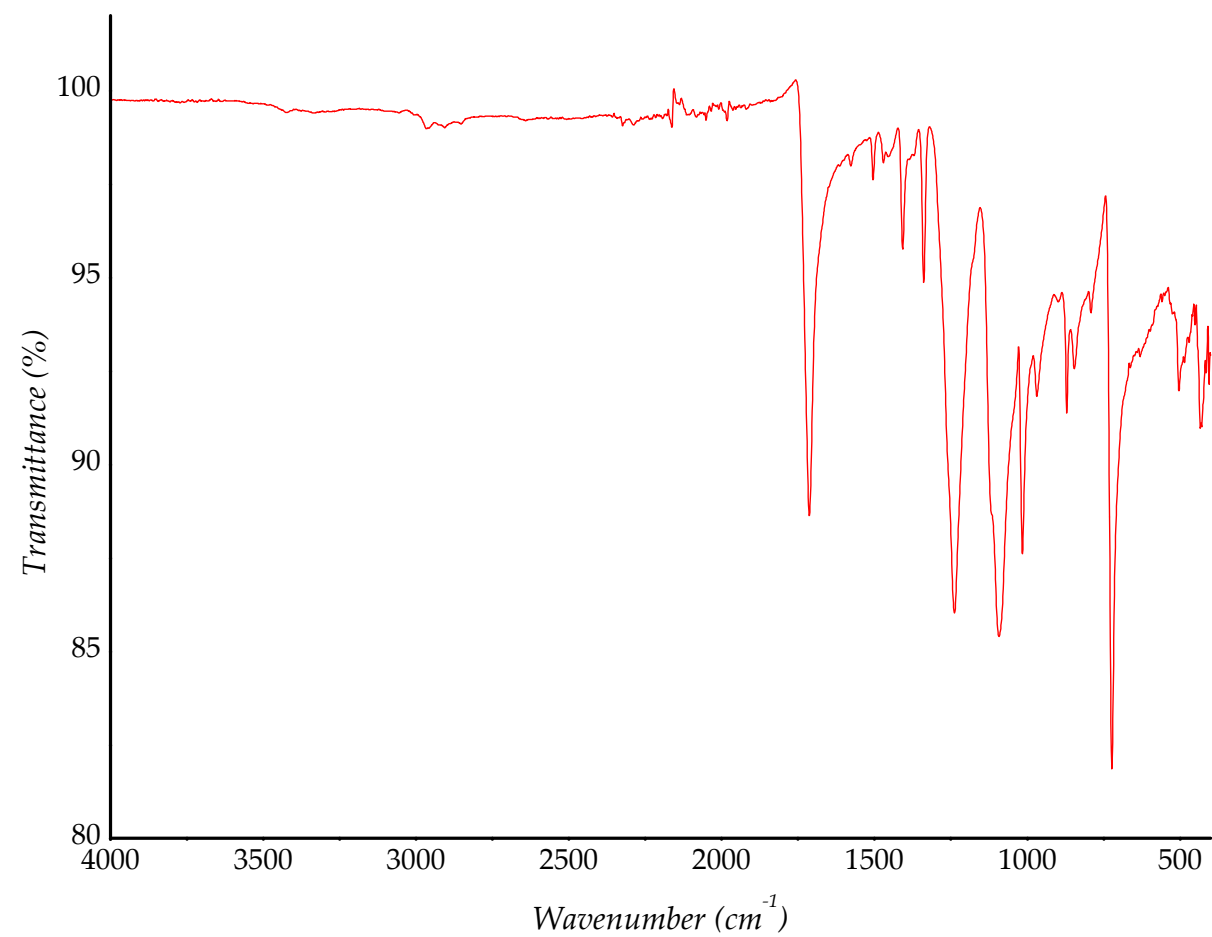

**Figure S2.** IR spectrum of compound **F1su24**

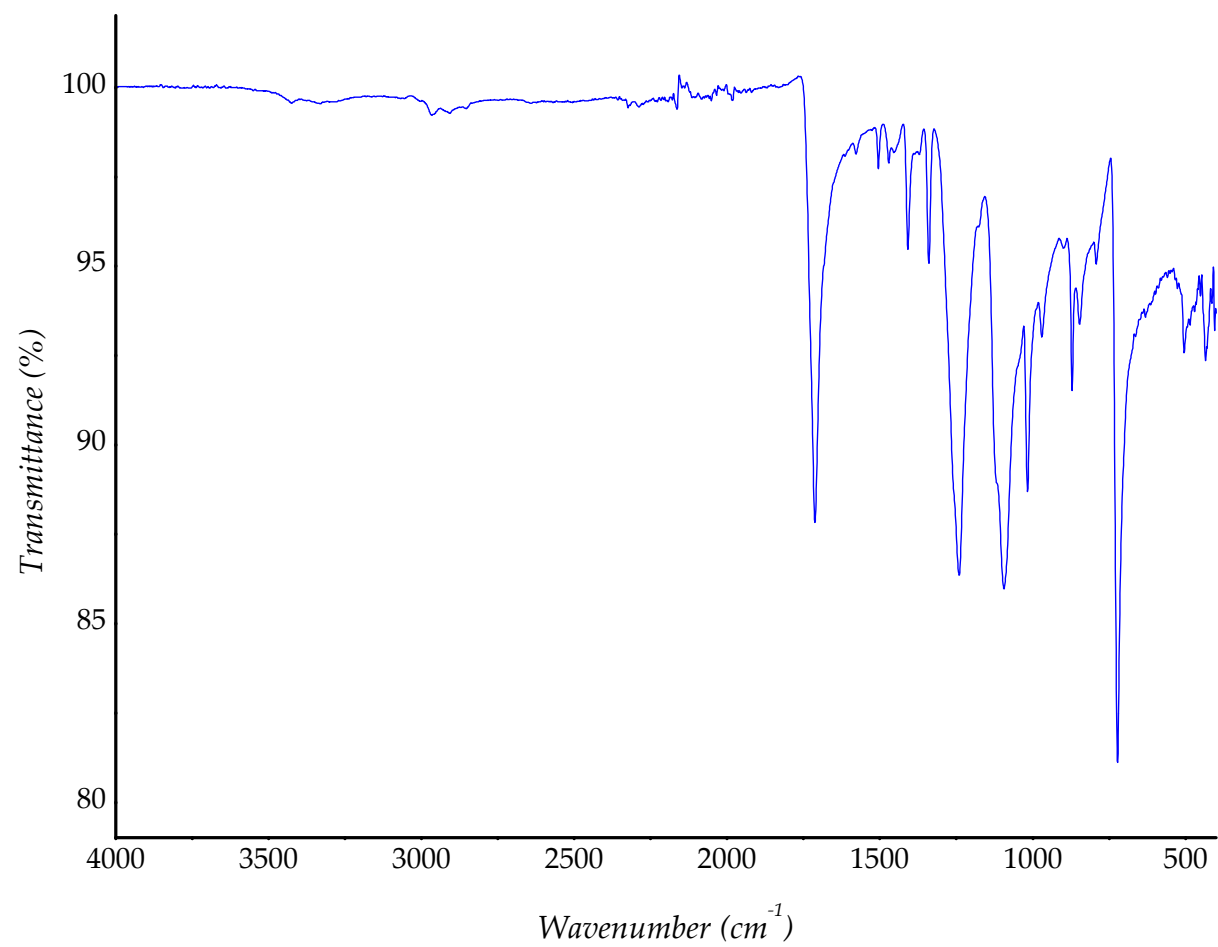

**Figure S3.** IR spectrum of compound **F1sh24**

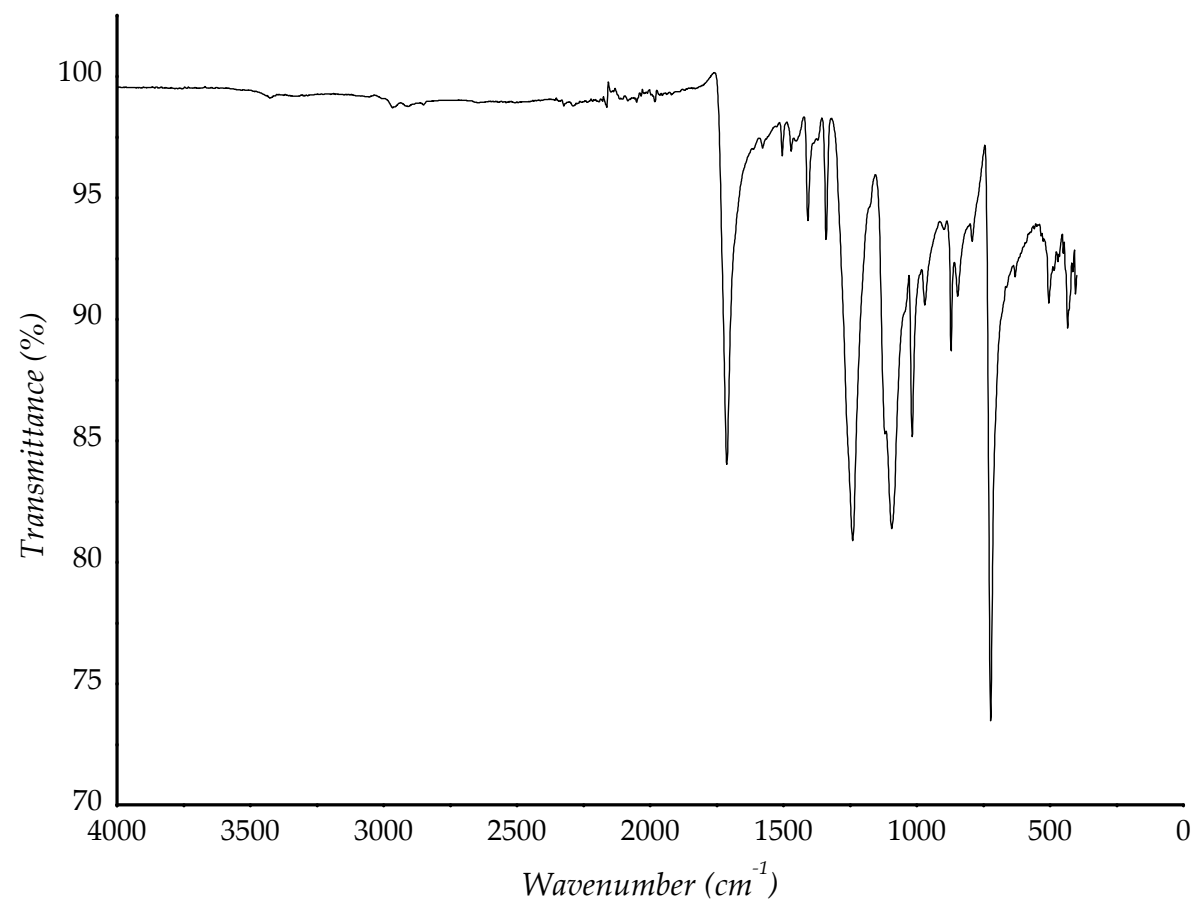

**Figure S4.** IR spectrum of compound **F2Ø**

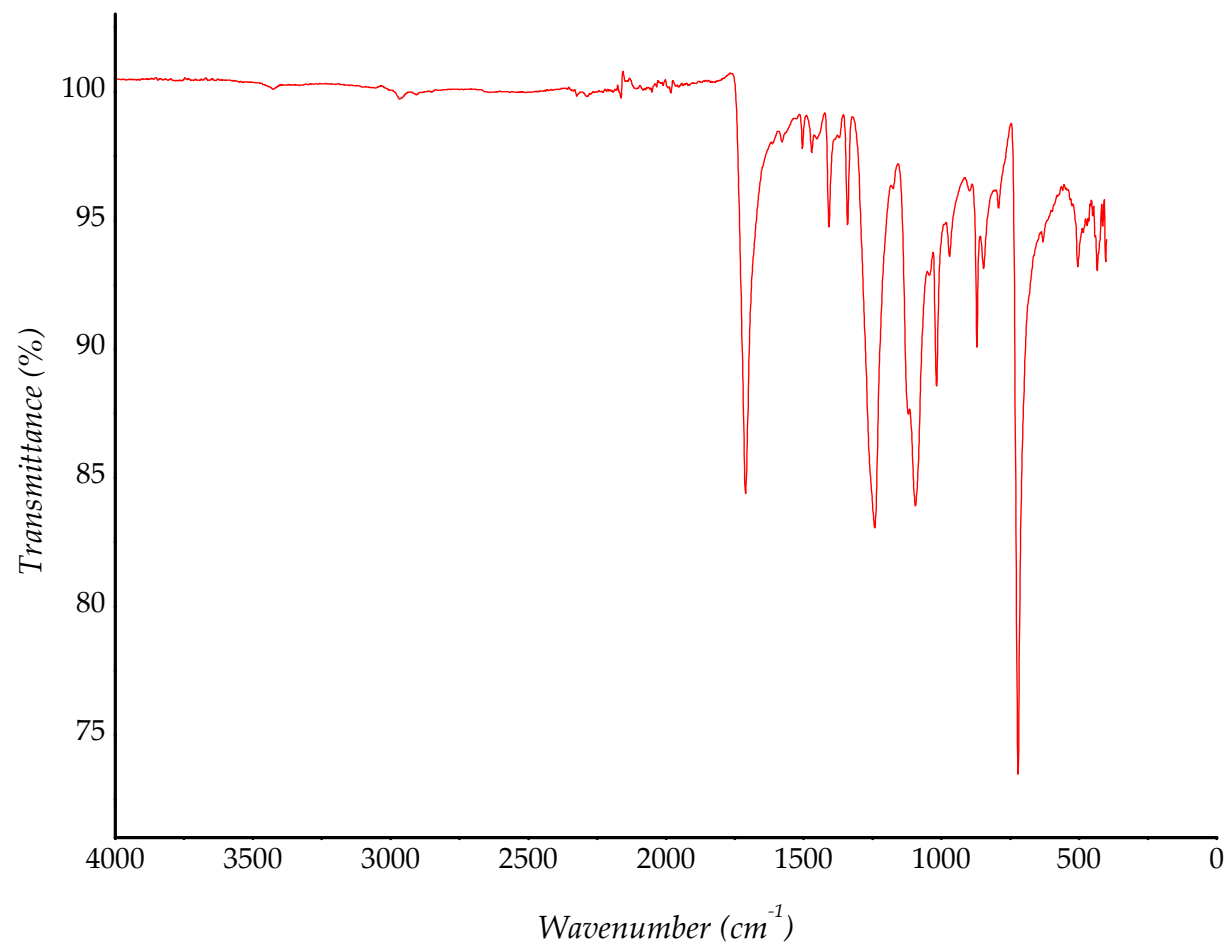

**Figure S5.** IR spectrum of compound **F2su24**

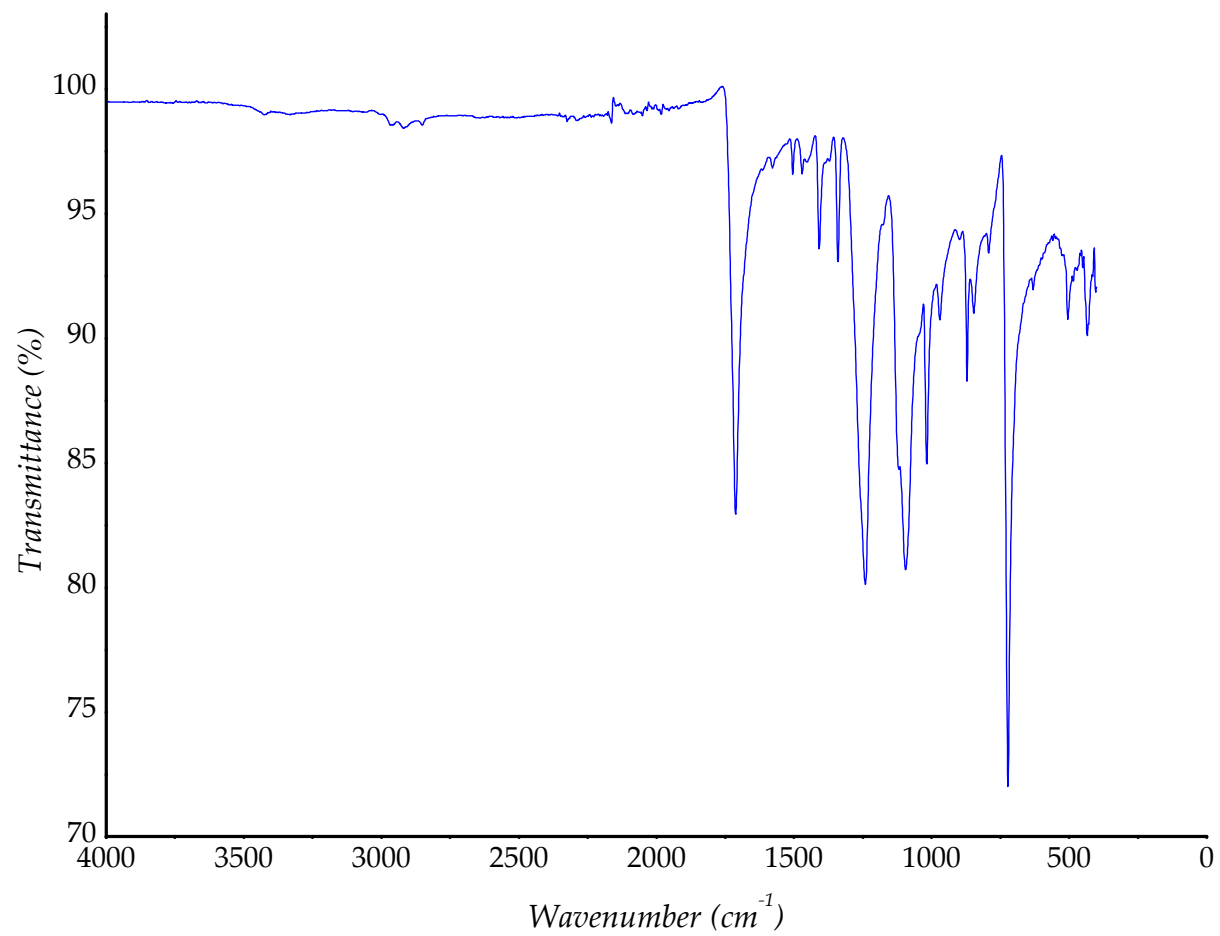

**Figure S6.** IR spectrum of compound **F2sh24**

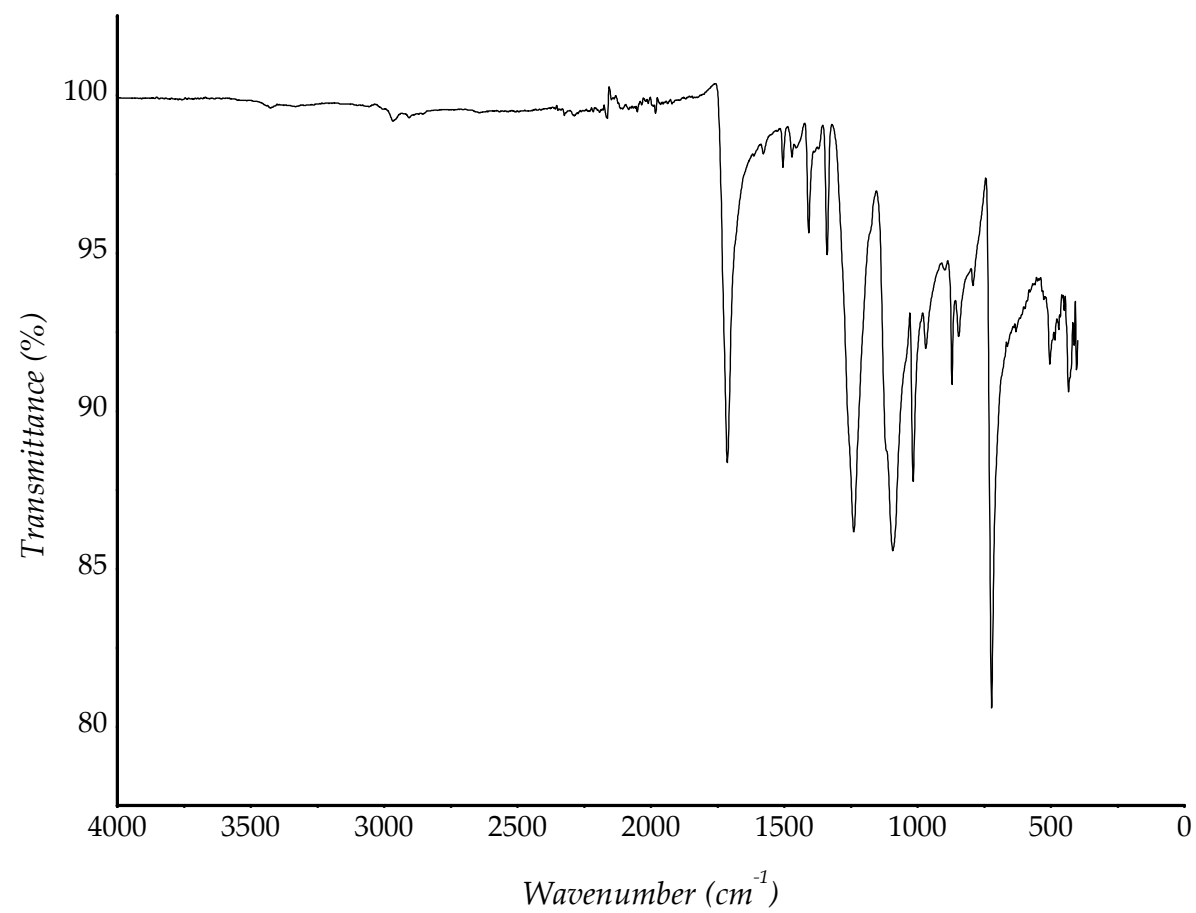

**Figure S7.** IR spectrum of compound **F3Ø**



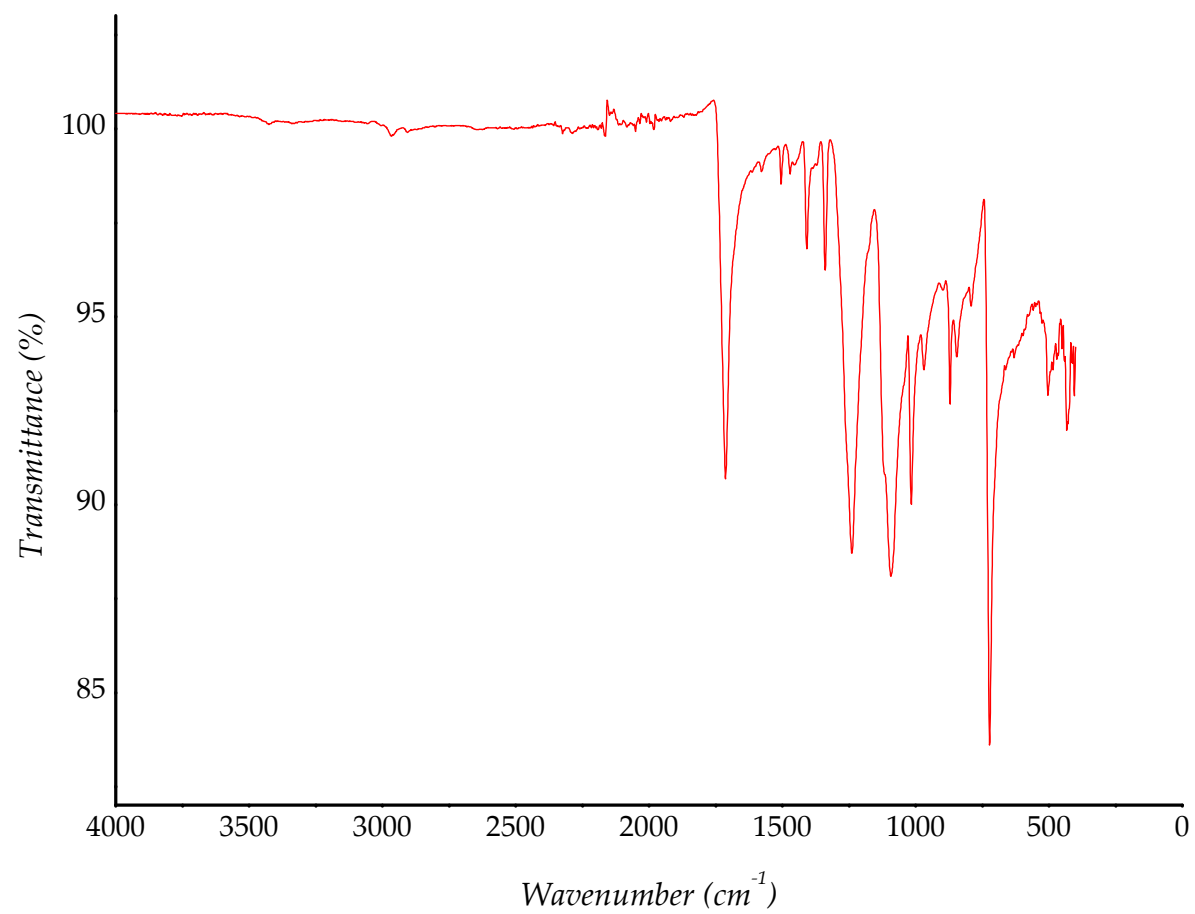

**Figure S8.** IR spectrum of compound **F3su24**

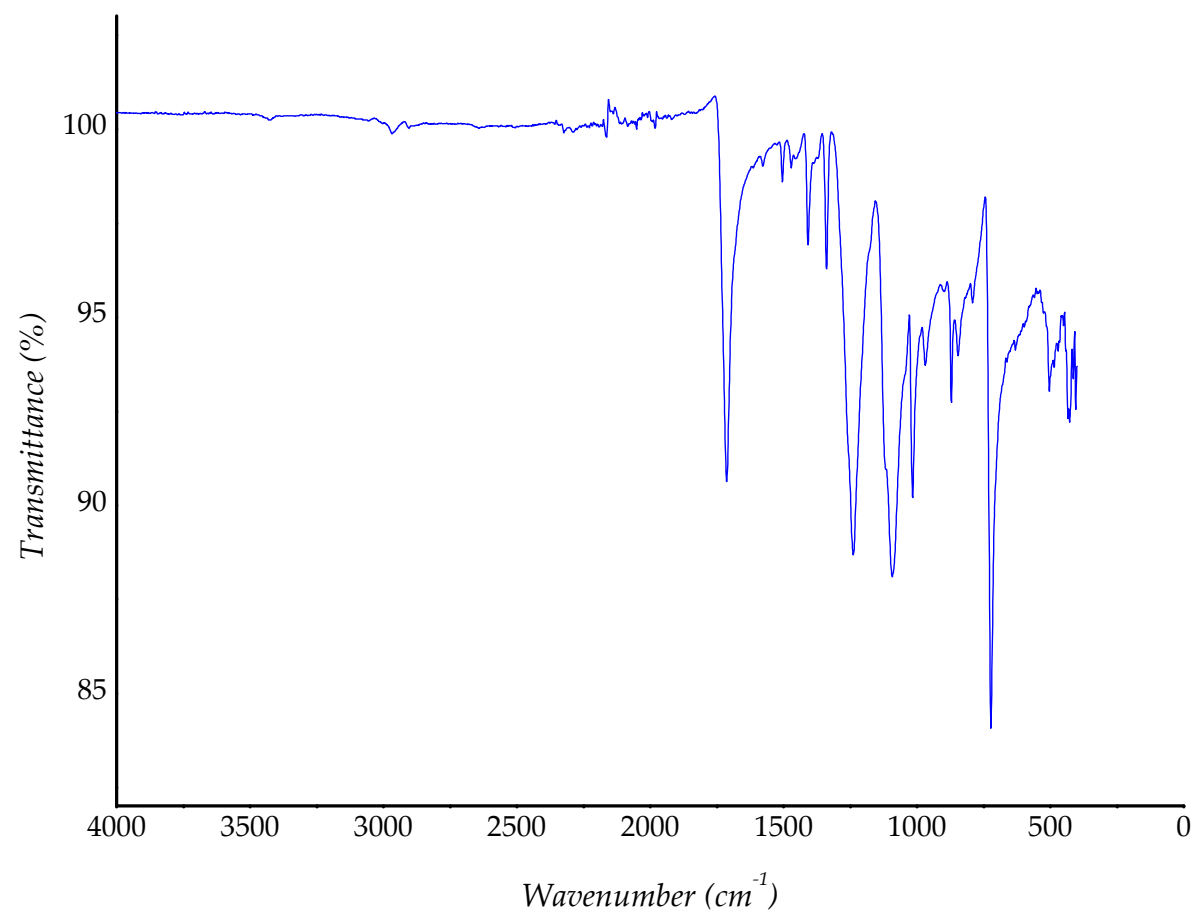

**Figure S9.** IR spectrum of compound **F3sh24**

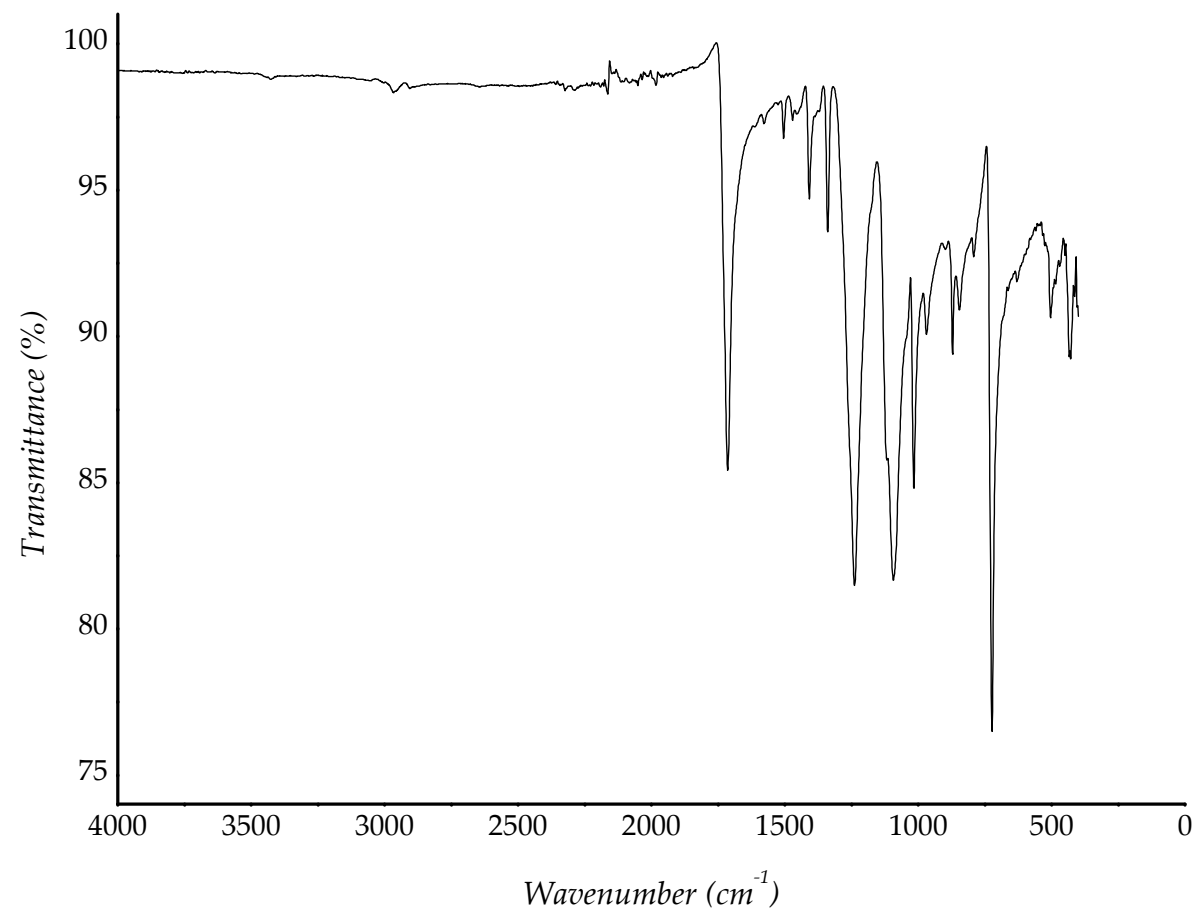

**Figure S10.** IR spectrum of compound **F40**

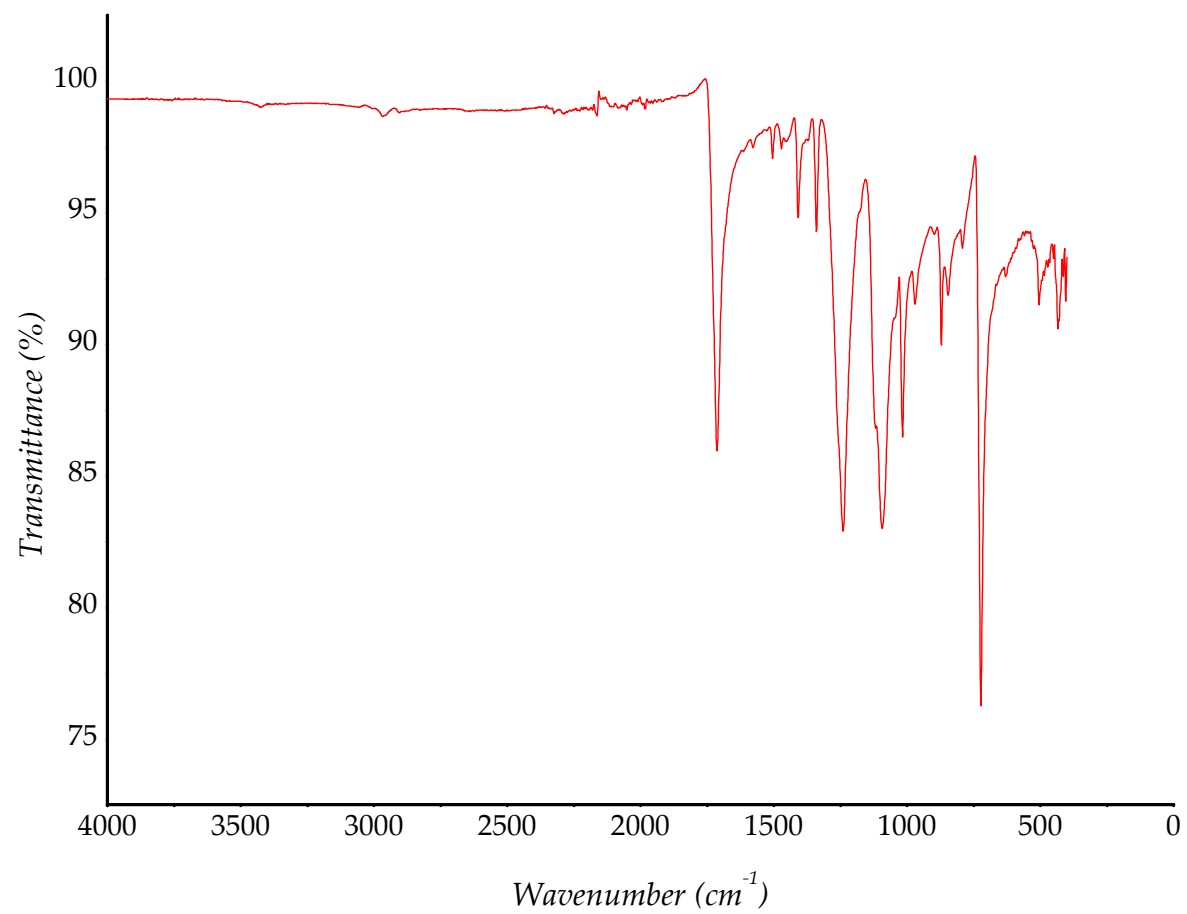

**Figure S11.** IR spectrum of compound **F4su24**

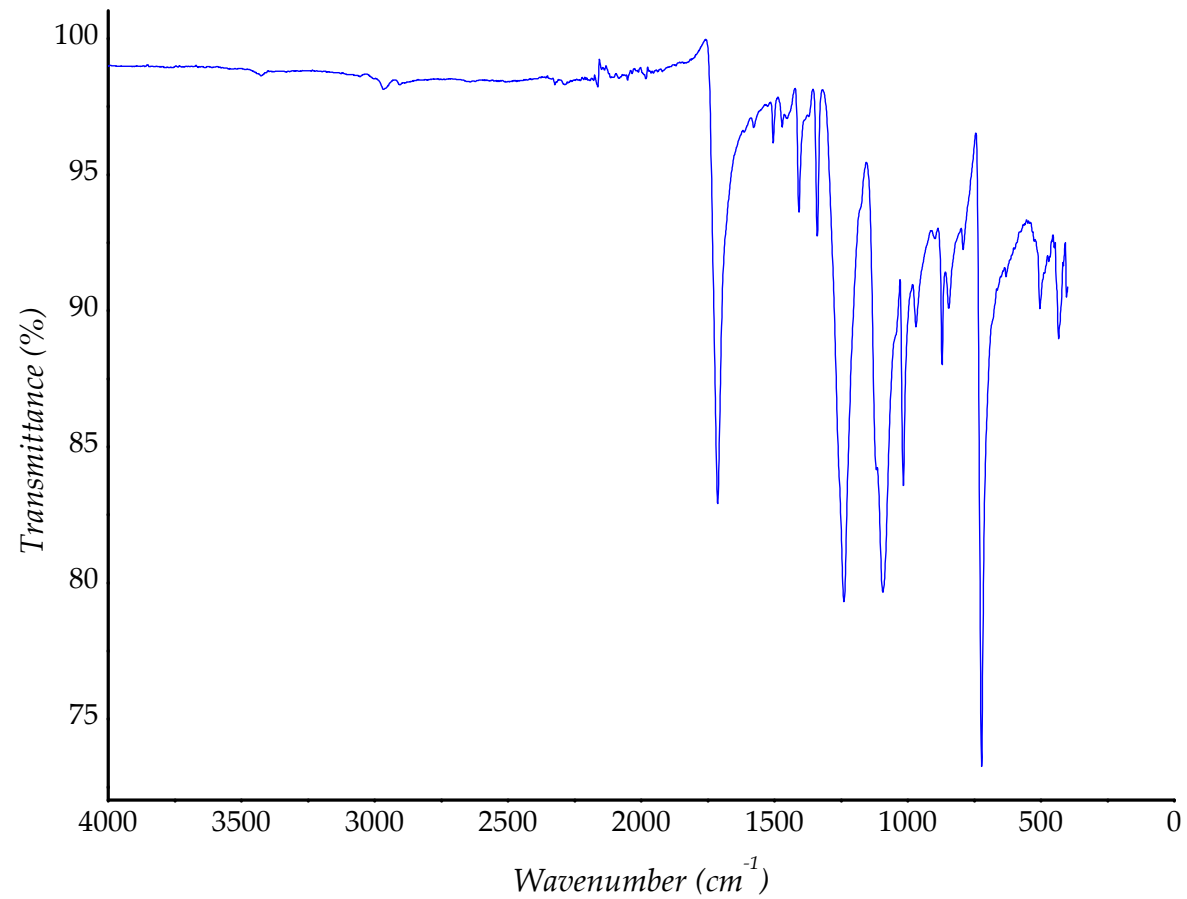

**Figure S12.** IR spectrum of compound **F4sh24**

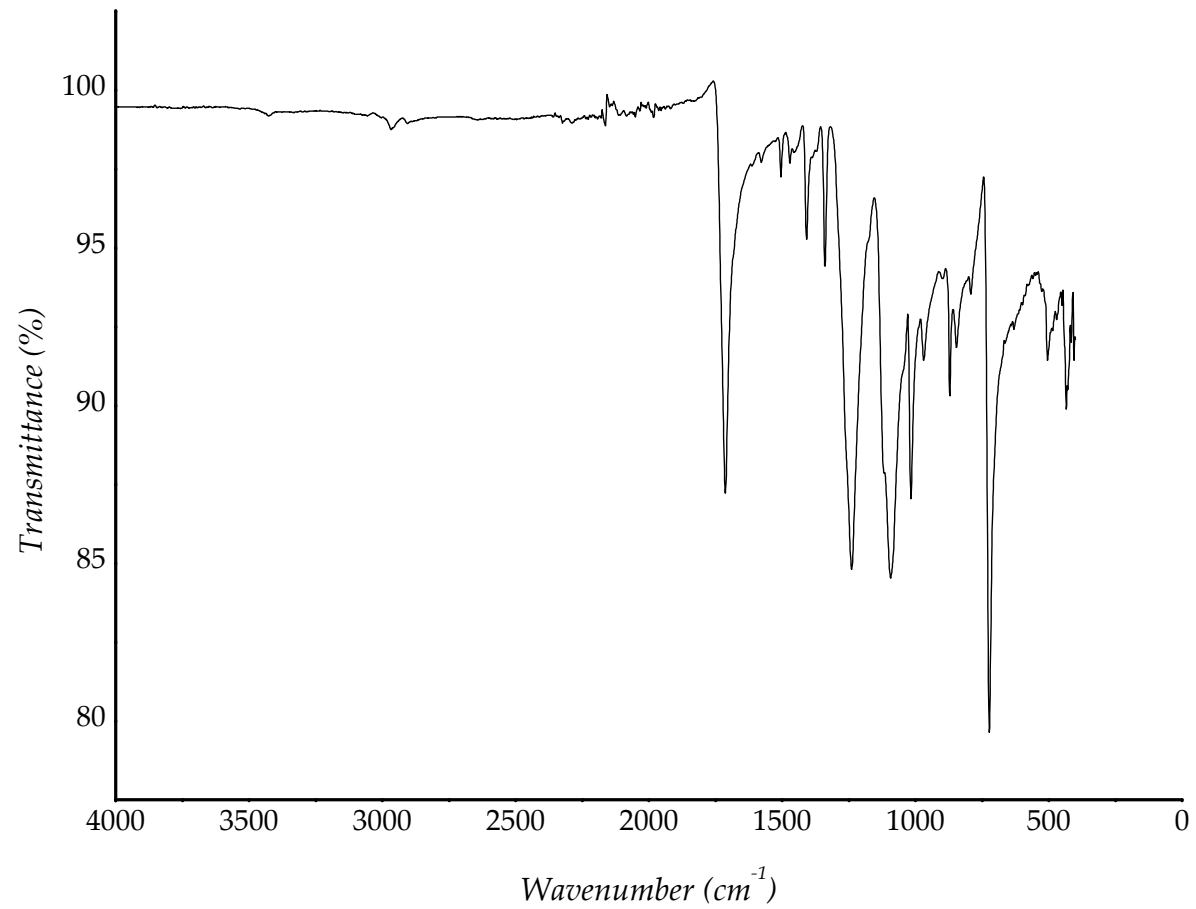

**Figure S13.** IR spectrum of compound **F5O**

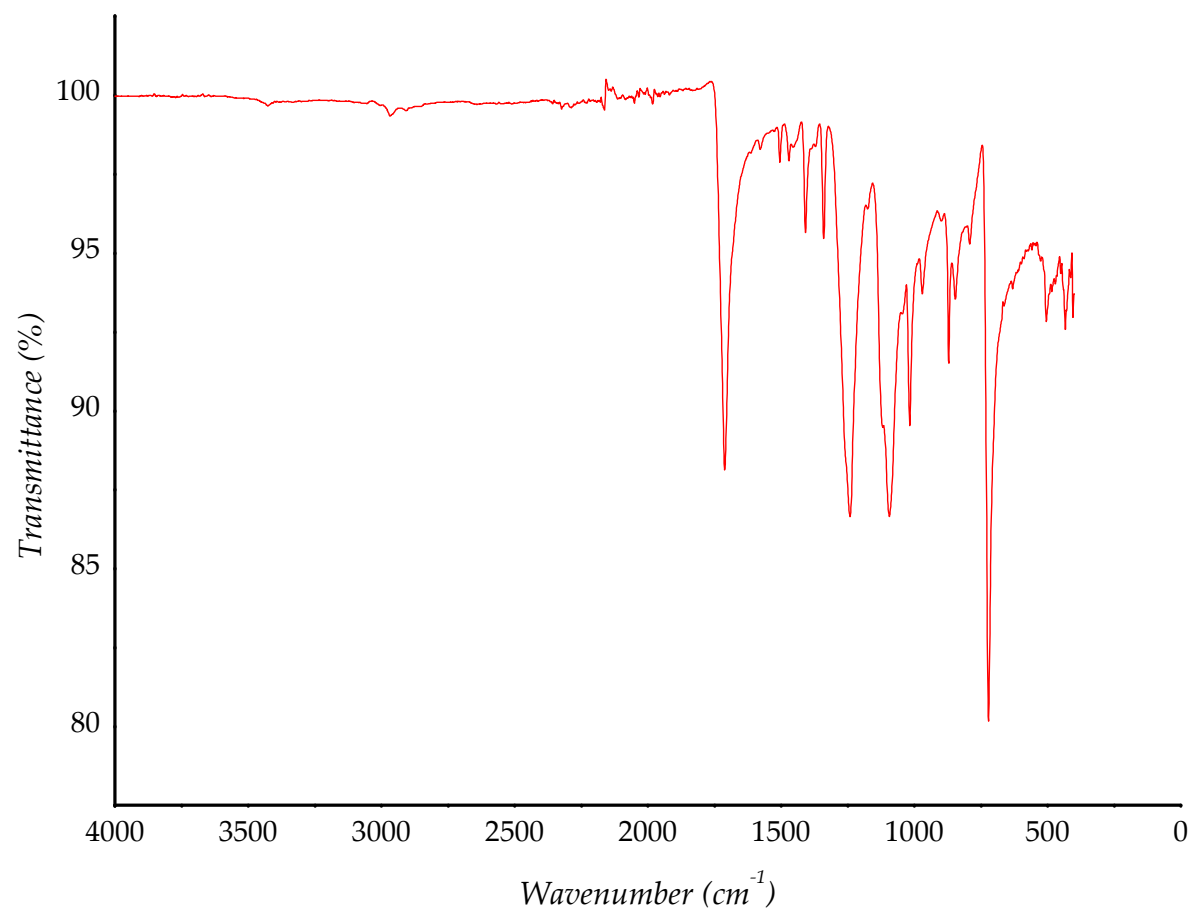

**Figure S14.** IR spectrum of compound **F5su24**

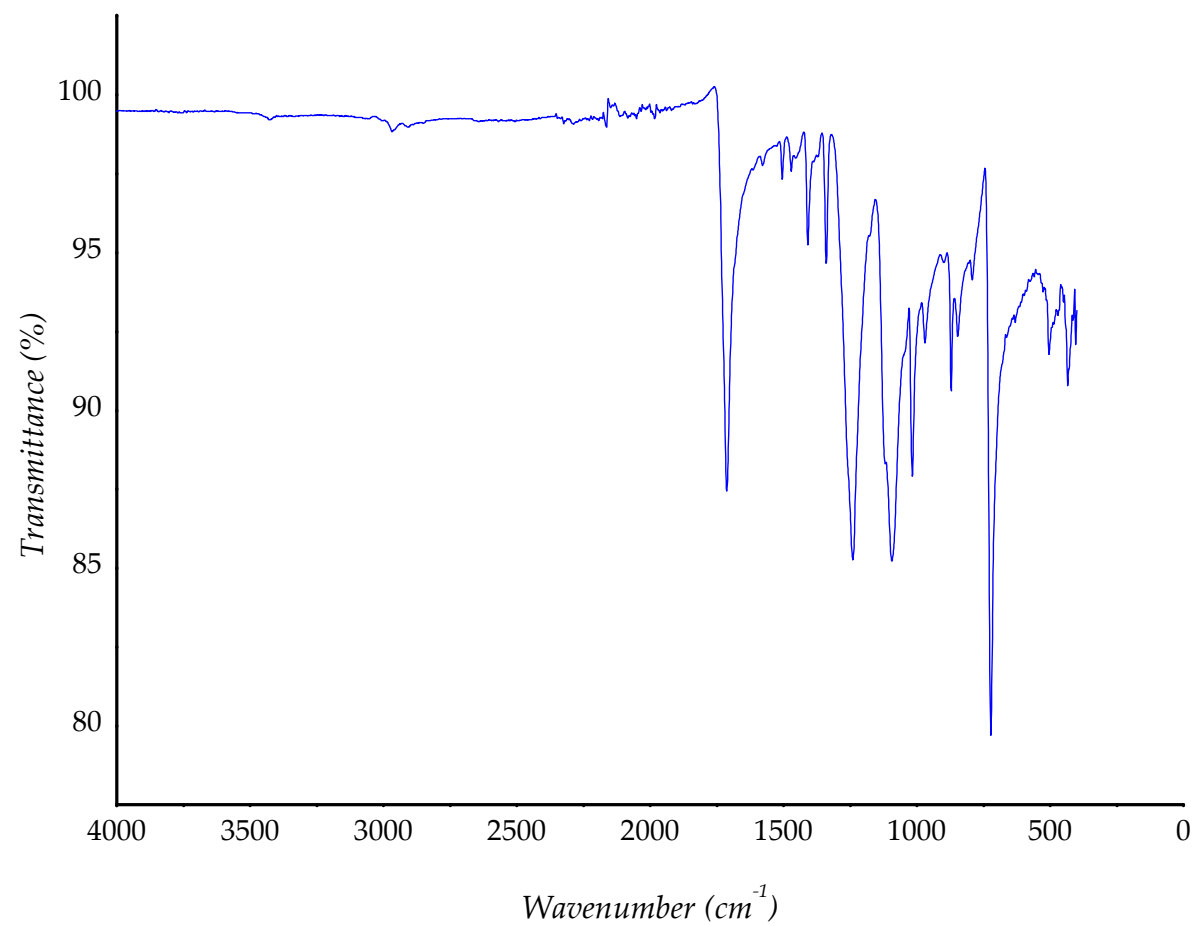

**Figure S15.** IR spectrum of compound **F5sh24**
